1     **EXPLORING WOMEN’S PERSPECTIVES ON ABORTION LEGALIZATION IN NAMIBIA:**  
2                   **INSIGHTS FROM RESIDENTS OF /GERERES, KEETMANSHOOP**

3     Rauna Namukwambi<sup>1†</sup>, Lovis Sheehama<sup>1†</sup>, Justice EK. Sheehama<sup>2\*</sup>, Hilma N. Nakambale<sup>3,4</sup>

4  
5     <sup>1</sup>Department of Community and Mental Health Nursing, School of Nursing and Public Health, University  
6     of Namibia, Southern Campus, Keetmanshoop, Namibia

7  
8     <sup>2</sup> School of Pharmacy, University of Namibia, Windhoek, Namibia

9  
10    <sup>3</sup>Department of Pharmaceutical Sciences, School of Health Sciences, University of KwaZulu-Natal,  
11    Westville Campus, Durban, South Africa

12    <sup>4</sup>Department of Global Health, University of Washington, Seattle, USA

13  
14    †These authors contributed equally to this work and share the first authorship

15    **\*Corresponding author:**

16    Email: [jeksheehama@gmail.com](mailto:jeksheehama@gmail.com)

17    **Word count:** 3422 words

18    **Abstract count:** 300 words

19    **Tables:** 5 tables

20 **ABSTRACT**

21

22 **Introduction:** Abortion is a globally controversial topic. Despite Namibia gaining independence in 1990,  
23 the country still upholds the apartheid inherited 1975 Abortion and Sterilization Act of South Africa,  
24 which places restrictions on abortion. There have been calls from many parliamentarians to legalize  
25 abortion on demand due to the alarming rate of backyard abortions that were putting Namibian women's  
26 lives at risk. However, there is opposition from Pro-life advocates. This study assessed the perceptions of  
27 women in /Gereres, Keetmanshoop regarding the legalization of abortion in Namibia.

28

29 **Methods:** This study utilized a quantitative, descriptive cross-sectional design. A non-probability  
30 systematic sampling technique was used to select participants. A self-administered questionnaire was  
31 used to collect data. Participants' perspectives were captured using structured three-point and five-point  
32 Likert scale checklists. Microsoft Excel was used to analyze data. Data were presented using frequency  
33 tables.

34

35 **Results:** The study revealed a variation of views from participants, mostly opposing the legalization of  
36 abortion in Namibia. Most women acknowledged that illegal abortion poses risks to women; however,  
37 they would not advocate for the legalization of abortion. Notably, several participants appeared to justify  
38 abortion in certain circumstances such as in cases of rape or incest, or if continuation of the pregnancy  
39 poses a health risk to the woman. Cultural and religious beliefs appeared to be major factors influencing  
40 women's opposing views on abortion.

41

42 **Conclusion:** The study highlights the complex and diverse perspectives of women in /Gereres,  
43 Keetmanshoop regarding the legalization of abortion in Namibia. While recognizing the risks associated  
44 with illegal abortion, most participants opposed its legalization, which could mostly be attributed to  
45 cultural and religious beliefs. However, some participants acknowledged specific circumstances where

46 abortion could be justified. This study provides women’s insights on the legalization of abortion in  
47 Namibia, useful for lawmakers, policymakers, and stakeholders in the field of reproductive health.

48

49

50

51

52

53

54

55

56

57

58

59

60

61

62

63

64

65

66

67

68

69

70

## 71 1. Background

72 Abortion is a highly contentious topic that permeates global cultural, social, moral, religious, and legal  
73 facets of life (1). Over 50 years ago, the World Health Assembly recognized abortion as a serious public  
74 concern (2). Addressing abortion as a national and global public health imperative should therefore be at  
75 the forefront of law and public policy deliberations as unsafe abortions continue to end the lives of many  
76 young women globally (3).

77 In Namibia, abortion is only permissible under special circumstances, as outlined in the Abortion and  
78 Sterilization Act of 1975. These circumstances include when the pregnancy is a danger to the woman's  
79 physical and mental health, pregnancy due to rape and incest, and other cases (4). Although South Africa,  
80 from which Namibia inherited the abortion law post-apartheid, changed its abortion law in 1996, Namibia  
81 continues to criminalize abortion even after its independence (5). Attempts to revise the Namibian  
82 Abortion and Sterilization Act of 1975 have been met with strong opposition from religious leaders and  
83 women's groups (5–10). The bill to oppose the Abortion and Sterilization Act of 1975 was first issued in  
84 1996 by Namibia's first Minister of Health and Social Services for public consultation. The bill aimed to  
85 replace the apartheid-inherited South African Abortion and Sterilization Act of 1975 and to extend the  
86 legality of abortion where a procedure can be done on demand within a specific time frame. However, the  
87 bill was ultimately opposed in 1999 due to severe public scrutiny (11).

88 Recently, an online petition which was launched to oppose the legalization of abortion in Namibia  
89 gathered more than 15,000 signatures (5). Several petitions on both sides of the abortion debate have  
90 since been tabled in parliament; however, the motion is yet to be debated and voted on (6). Therefore, to  
91 date, abortion in any other circumstances outside the current Abortion and Sterilization Act of 1975  
92 special provisions remains a criminal offence for women and persons who perform it. The punishment for  
93 illegal abortion is a fine of up to N\$5,000 (~USD 300) or an imprisonment term of up to five years, or  
94 both (12).

95 Although abortion is massively restricted in Namibia, this does not prevent women and girls from  
96 terminating unwanted pregnancies. The situation has forced many women to resort to unsafe abortions,  
97 contributing to maternal death (12–15). Statistics on women who opt for abortion in Namibia are hard to  
98 obtain as many cases go undocumented (16). The local media reported that in 2016, the country recorded  
99 7,335 suspected cases of illegal abortions in state healthcare facilities (17). The Namibian police's statistics  
100 between 2013 to 2019 have only confirmed 2% of the 138 authorized abortion cases reported (16).

101 There is currently limited knowledge of the perceptions of women regarding the legalization of abortion  
102 on demand and the factors contributing to such perceptions. Therefore, this study assessed the perceptions  
103 of women residing in /Gereres, Keetmanshoop, on legalizing abortion in Namibia, as women experience  
104 the effects of the present laws on abortion.

## 105 **2. MATERIALS AND METHODS**

106

### 107 **2.1 Research design**

108 The study employed a quantitative cross-sectional survey method. The survey explored the perceptions of  
109 women on how the legalization of abortion would affect the demand for abortion services.

110

### 111 **2.2 Study setting and population**

112 This study was conducted at /Gereres location in the Keetmanshoop district. Keetmanshoop is a town in  
113 the southern part of Namibia, in the //Karas region, with a population of approximately 26,000 according  
114 to the latest population census data (18). The study population consisted of women of childbearing age  
115 residing in /Gereres location, Keetmanshoop, between the ages of 18 to 49 years. Male participants, women  
116 below the age of 18, and individuals who could not consent to participate were excluded from the study.

117

### 118 **2.3 Sample and sampling method**

119 Given the relatively small population size of our study setting, the survey targeted all women ages 18-49  
120 years. A combination of purposive and systematic sampling was used to determine the sample size. The  
121 first participant was randomly selected as a starting point; after that, the researcher approached every second  
122 house to recruit participants. There was no specific reason for selecting this method; however, the  
123 researchers felt it was in the interest of the study findings to gather data. The sample size for this study was  
124 forty women.

### 125 **2.4 Research Instruments**

126 The study used a structured self-administered questionnaire consisting of close-ended questions. The  
127 questionnaire was constructed in English and translated into Afrikaans, Rukwangali, and Oshiwambo as  
128 these were the languages spoken by most of the participants in that area. The questionnaire consisted of  
129 two sections. Section A included socio-demographic data of the participants (age, gender, religion, marital  
130 status, language, and educational qualifications); Section B was on perceptions regarding the legalization  
131 of abortion, and participants were asked to state their opinions using a 3-point Likert scale requiring a “yes”,  
132 “no” or “not sure” and 5-point Likert scale ranging from 1=strongly disagree to 5= strongly agree. The  
133 questionnaire was constructed based on the literature on abortion, specifically from the Namibian and Sub-  
134 Saharan Africa context.

### 135 **2.5 Validity and Reliability**

136 The questionnaire was examined for validity by experts in the field of reproductive health, in the  
137 Department of Reproductive Health at the Ministry of Health and Social Services, to assess the extent to  
138 which the questions were going to fulfill the aims of the study. To enhance the reliability of the  
139 questionnaire, a pilot study was conducted to pre-test the study instrument to ensure consistent results.  
140 The questionnaire was piloted twice on seven random participants in Kopeislaagte location,

141 Keetmanshoop, to confirm reliability (the findings from the pilot study are not part of the findings in this  
142 study).

## 143 **2.6 Procedures for data collection**

144 The primary researcher approached potential participants, explained the purpose of the study, and  
145 obtained consent from participants to proceed with the study. Participants were recruited between August  
146 and September 2022. Data collection took eight to fifteen minutes for each participant to complete the  
147 questionnaire. The data collection process took three weeks. The researcher wore a mask and used hand  
148 sanitizer for herself and the participants to ensure COVID-19 regulations were adhered to. A social  
149 distance of about 1.5 meters was also put in place.

## 150 **2.7 Data analysis**

151 After data collection, responses to the questionnaire were entered into a Microsoft Excel 2019 sheet, and a  
152 statistician analyzed and summarized the data. Descriptive statistics, including frequency tables, were  
153 used to present the findings.

## 154 **2.8 RESEARCH ETHICS and Informed Consent**

155 Ethical approval was obtained from the School of Nursing and Public Health's Ethics Committee, before  
156 commencing with the study (**Annexure A**). The municipality of Keetmanshoop also issued a letter of  
157 approval to conduct the study. The research was conducted on human beings; thus, the researcher was  
158 guided by the Belmont Ethical Principles and Guidelines for the Protection of Human Subjects of  
159 Research (19).

160 Full informed consent was issued to the participants. The researcher explained the purpose of the study  
161 and research objectives to the participants, informed them about their rights to refuse to participate, and

162 ensured that participants understood the information to decide whether to consent. Participants consented  
163 to participate by signing the informed consent form (**Annexure B**) before completing the questionnaire.

### 164 3. RESULTS

165  
166 The demographic characteristics of the study participants are shown in **Table 1**. A total of 40 participants  
167 were included in the study. Majority of the participants (55.0%) were between the ages of 18-27 years.  
168 Most participants were single (65.0%), with 42.5% having completed grades 8-10 as their highest level of  
169 education. An equal number of participants (37.5%) spoke Oshiwambo or Khoekhoegowab as a home  
170 language. All participants in this study were of the Christian religion.

171  
172 **Table 1. Participant Demographic characteristics (N=40)**

| 173 Demographic characteristics | n (%)     |
|---------------------------------|-----------|
| <b>Age in years</b>             |           |
| 18-27                           | 22(55.0%) |
| 28-37                           | 11(27.5%) |
| 38-47                           | 6(15.0%)  |
| ≥ 48                            | 1(2.50%)  |
| <b>Marital Status</b>           |           |
| Single                          | 26(65.0%) |
| Living with a partner           | 9(22.5%)  |
| Married                         | 4(10.0%)  |
| Other                           | 1(2.5%)   |
| <b>Education level</b>          |           |
| Grades 1 to 7                   | 4 (10.0%) |
| Grades 8 to 10                  | 17(42.5%) |
| Grades 11 to 12                 | 15(37.5%) |
| No formal education             | 4(10.0%)  |
| <b>Home Language</b>            |           |
| Oshiwambo                       | 15(37.5%) |
| Khoekhoegowab                   | 15(37.5%) |
| Rukwangali                      | 5(12.5%)  |
| Afrikaans                       | 3(7.5%)   |
| Other                           | 2(5.0%)   |
| <b>Religion</b>                 |           |
| Christian                       | 40(100%)  |

175 **Note:** N=40



176

177

178 **3.1 Participants’ ethical, moral, and cultural perceptions regarding the legalization of abortion**

179 Overall, most of the participants (65.0%) felt that abortion should not be legalized because it is a sin, with  
 180 half of the participants in the study stating that they would not advocate for the legalization of abortion if  
 181 it were against their religious beliefs. Nearly all participants (90.0%) stated that their religion prohibits  
 182 women from having an abortion. Similarly, most of the participants (62.5%) stated that they are against  
 183 abortions because abortions are culturally unacceptable, and that abortion constitutes murder. While most  
 184 of the participants (62.5%), indicated that illegal abortions pose health risks to women, an equal  
 185 proportion felt that legalizing abortion would encourage people to have more sexual partners. Notably,  
 186 most participants (62.5%) indicated that they would not advocate for abortion to be legalized on demand  
 187 (Table 2).

188 **Table 2. Ethical, moral and cultural perceptions regarding the legalization of abortion**

| Perceptions                                                                                  | Degree of agreement |           |          |
|----------------------------------------------------------------------------------------------|---------------------|-----------|----------|
|                                                                                              | n (%)               |           |          |
|                                                                                              | Yes                 | No        | Not sure |
| Abortion should not be legalized because it is a sin                                         | 26(65.0%)           | 11(27.5%) | 3(7.5%)  |
| Would you advocate for the legalization of abortion if it is against your religious beliefs? | 16(40.0%)           | 20(50.0%) | 4(10.0%) |
| Does your religion allow people to have an abortion?                                         | 1(2.5%)             | 36(90.0%) | 3(7.5%)  |
| I am against abortion because it is not accepted in my culture                               | 25(62.5%)           | 11(27.5%) | 4(10.0%) |
| Abortion is murder                                                                           | 25(62.5%)           | 13(32.5%) | 2(5.0%)  |
| In your opinion, do illegal abortions pose any health risks?                                 | 25(62.5%)           | 7(17.5%)  | 8(20.0%) |

|                                                                        |           |           |         |
|------------------------------------------------------------------------|-----------|-----------|---------|
| Legalizing abortion will encourage people to have more sexual partners | 25(62.5%) | 13(32.5%) | 2(5.0%) |
| Would you advocate for abortion to be legalized on demand?             | 12(30.0%) | 25(62.5%) | 3(7.5%) |

189 **Note:**  $N=40$

190 **3.2 Participants legal and socio-economic perceptions regarding the legalization of abortion**

191 Participants had mixed opinions regarding whether abortion should be legalized under different social and  
 192 economic circumstances. None of the participants strongly agreed that abortion should be legalized in  
 193 cases of poverty or financial problems. Moreover, participants had divided opinions on whether abortion  
 194 should be allowed if a young girl was in school or too young. Some participants (37.5%) strongly  
 195 disagreed that abortion should be allowed in cases where the mother does not want to keep the baby, with  
 196 only 2 participants (5%) agreeing that women should be free to decide whether to have an abortion. Only  
 197 22.5% of the participants agreed that access to abortion is a woman’s reproductive right. **Table 3**

198 **Table 3. Legal and socio-economic perceptions for permissible abortion**

| Perceptions                                                                                               | Degree of Agreement<br>n (%) |           |           |           |                   |
|-----------------------------------------------------------------------------------------------------------|------------------------------|-----------|-----------|-----------|-------------------|
|                                                                                                           | Strongly agree               | Agree     | Uncertain | Disagree  | Strongly Disagree |
| Abortion should be allowed in cases of poverty or financial problems                                      | 0(0.0%)                      | 12(30.0%) | 5(12.5%)  | 18(45.0%) | 5(12.5%)          |
| Abortion should be allowed if a girl is in school or is too young (below the legal age of sexual consent) | 2(5.0%)                      | 14(35.0%) | 5(12.5%)  | 14(35.0%) | 5(12.5%)          |
| Abortion should be allowed in cases where the mother does not want to keep the baby                       | 10(25.0%)                    | 7(17.5%)  | 2(5.0%)   | 6(15.0%)  | 15(37.5%)         |
| Women should be free to decide whether to have an abortion or not                                         | 13(32.5%)                    | 2(5.0%)   | 3(7.5%)   | 4(10.0%)  | 18(45.0%)         |

|                                                         |          |          |          |           |          |
|---------------------------------------------------------|----------|----------|----------|-----------|----------|
| Access to safe abortion is a woman's reproductive right | 5(12.5%) | 9(22.5%) | 7(17.5%) | 14(35.0%) | 5(12.5%) |
|---------------------------------------------------------|----------|----------|----------|-----------|----------|

199 **Note:**  $N=40$

200

201 **3.3 Participants' perceptions on the legal and health conditions for permissible abortion**

202 **Table 4** summarizes participants' perceptions on the legal and health conditions for permissible abortion.

203 Most of the participants (52.5%) strongly agreed that abortion should be allowed if the pregnancy was a  
 204 result of rape/sexual assault or incest. Furthermore, most of the participants (65.0%) agreed that abortion  
 205 should be allowed if the continuation of the pregnancy poses a health risk to the woman. Only 10% and  
 206 2.5% of participants strongly agreed that abortion should be allowed if the pregnant woman is mentally  
 207 incapacitated or if the fetus has congenital anomalies, respectively.

208 **Table 4: Perceptions of legal and health conditions for permissible abortion**

| Perceptions                                                                                      | Degree of Agreement<br>n (%) |           |           |           |                   |
|--------------------------------------------------------------------------------------------------|------------------------------|-----------|-----------|-----------|-------------------|
|                                                                                                  | Strongly Agree               | Agree     | Uncertain | Disagree  | Strongly Disagree |
| Abortion should only be allowed in cases of rape/sexual assault or incest                        | 21(52.5%)                    | 12(30.0%) | 1(2.5%)   | 3(7.5%)   | 3(7.5%)           |
| Abortion should be allowed if the continuation of the pregnancy poses a health risk to the woman | 6(15.0%)                     | 26(65.0%) | 4(10.0%)  | 3(7.5%)   | 1(2.5%)           |
| Abortion should be allowed if the pregnant woman is mentally incapacitated                       | 4(10.0%)                     | 18(45.0%) | 3(7.5%)   | 12(30.0%) | 3(7.5%)           |
| Abortion should be allowed if the fetus has congenital anomalies                                 | 1(2.5%)                      | 17(42.5%) | 8(20.0%)  | 12(30.0%) | 2(5.0%)           |

209 **Note:**  $N=40$

210

211 **3.4 Participants’ perceptions on the effects of legalizing abortion on women’s health and on the**  
 212 **overall societal perception on abortion**

213 When asked about the potential consequences of legalizing abortion, 35.0% and 42.5% of participants  
 214 agreed that access to safe abortions may result in women/girls using abortion as a substitute for  
 215 contraceptives and may result in undermining pregnancy prevention efforts, respectively. While most  
 216 participants (57.5%) agreed that restrictions to safe abortions push women/girls into unsafe abortion  
 217 practices, none of the participants strongly agreed that legalizing would reduce the social stigma  
 218 surrounding illegal abortion and only 7.5% strongly agreed that legalizing abortion may decrease baby  
 219 dumping, **Table 5**.

220 **Table 5: Perceptions of the effects of legalizing abortion on women’s health and on the overall**  
 221 **societal perception on abortion**

| Perceptions                                                                                          | Degree of Agreement<br>n (%) |           |           |           |                   |
|------------------------------------------------------------------------------------------------------|------------------------------|-----------|-----------|-----------|-------------------|
|                                                                                                      | Strongly Agree               | Agree     | Neutral   | Disagree  | Strongly Disagree |
| Access to safe abortions may result in women/girls using abortion as a substitute for contraceptives | 5(12.5%)                     | 14(35.0%) | 6(15.0%)  | 12(30.0%) | 3(7.5%)           |
| Access to a safe abortion may result in the undermining of pregnancy prevention efforts              | 5(12.5%)                     | 17(42.5%) | 4(10.0%)  | 12(30.0%) | 2(5.0%)           |
| Restrictions to safe abortions push women/girls into unsafe abortion practices                       | 3(7.5%)                      | 23(57.5%) | 6(15.0%)  | 6(15.0%)  | 2(5.0%)           |
| Legalizing abortion would reduce the social stigma surrounding illegal abortion.                     | 0(0.0%)                      | 11(27.5%) | 14(35.0%) | 9(22.5%)  | 6(15.0%)          |
| Legalizing abortion may decrease baby dumping                                                        | 3(7.5%)                      | 14(35.0%) | 8(20.0%)  | 9(22.5%)  | 6(15.0%)          |

222 **Note:** *N=40*

223

224

## 225 **Discussion**

226 The legalization of abortion remains a highly contested issue in Namibia. In this study, we explored the  
227 perceptions of women regarding the legalization of abortion in Namibia, as well as the factors influencing  
228 these perceptions. Overall, our study found that women in //Gereres, Keetmanshoop did not support the  
229 legalization of abortion. Several reasons were indicated as contributing factors to the poor support for  
230 abortion legalization. Firstly, participants found abortion to be ethically, morally, and culturally  
231 unacceptable. Most of the participants in our study indicated that abortion should not be legalized as they  
232 viewed it as a sin, and that it constituted murder. These findings are consistent with studies in Kenya and  
233 Nigeria that found that participants did not support abortion for religious and moral reasons (20,21).  
234 Similarly, a study in the UK found that most participants acknowledged that abortion was socially  
235 unacceptable and viewed as highly taboo (22). These findings were not surprising, considering that all the  
236 participants in our study were affiliated with the Christian religion. It is highly plausible that the  
237 participants' perceptions regarding the legalization of abortion are deeply rooted in religious scriptures and  
238 doctrine, as well as perceptions and theories about when life begins. Religious doctrine and beliefs may  
239 impede public health recommendations regarding abortion (23) and may potentially propagate the  
240 prohibition of abortion in Namibia.

241 Despite most participants acknowledging that illegal abortions pose health risks to women, most of the  
242 participants indicated that they would not advocate for abortion to be legalized on demand. Comparative  
243 studies in Namibia found that 49% of participants stated that they would not advocate for abortion to be  
244 legalized under certain provision, despite 93% of respondents agreeing that illegal abortions pose health  
245 risks (12). These findings may indicate strong support for the current restrictive abortion laws among  
246 Namibians, regardless of the associated health implications of unsafe abortions. Therefore, alternative  
247 methods may need to be provided to reduce the health risks to women due to illegally performed abortions.  
248 Taken together, these results highlight the interplay of religion and culture in shaping perceptions regarding

249 the legalization of abortion and are therefore important factors to be considered when assessing the  
250 acceptability of abortion in Namibian communities.

251 Secondly, our study found that most women believed that legalizing abortion would promote promiscuity.  
252 Similar to our findings, a study by Bisong et al (2016) reported that most of the participants in the study  
253 stated that legalizing abortion would promote promiscuity (24). In contrast, a study in Ghana that  
254 investigated the perceptions of schoolgirls regarding abortion found that most of the respondents disagreed  
255 that access to abortion services would result in women having more sexual partners (25). While these two  
256 studies did not conduct statistical analysis to assess the correlation between abortion legalization and sexual  
257 behavior, a study in the US found evidence to suggest a causal relationship between abortion legalization  
258 and increased risky sexual behavior, as well as increased incidences of sexually transmitted diseases (26).  
259 A study by Jonathan & Stratmann (2003) found that incidences of gonorrhoea and syphilis were significantly  
260 and positively correlated with the legalization of abortion in the US in the 1970s (26). While these findings  
261 may not necessarily be generalizable, they provide important considerations for legalizing abortion in  
262 Namibia, given the current burden of HIV and other sexually transmitted diseases in the country (27,28).  
263 These findings highlight that the legalization of abortion may need to be followed by stringent policies to  
264 increase the accessibility and availability of contraceptives, such as condoms, to prevent the transmission  
265 of sexually transmitted diseases and other potential, unintended consequences.

266 We observed interesting variations in the perceptions regarding abortion when participants were provided  
267 with various case scenarios. We found that participants had divided opinions on whether abortion should  
268 be legalized in cases of poverty or financial problems, and if a girl was in school or was too young. Societal  
269 norms and economic and legal obstacles have a significant influence on women's decisions to terminate  
270 pregnancy (29). On the permissibility of abortion in schoolgirls, several studies have demonstrated that the  
271 desire to continue education was among the most popular reasons for girls to opt for an abortion (25,30).  
272 Participants' opinions also varied on whether abortion should be allowed in cases where the mother does  
273 not want to keep the baby. Only a small proportion of participants recognized access to safe abortion as a

274 woman's reproductive right, thus shedding light on most participants' views on sexual and bodily  
275 autonomy. Failure to recognize abortion as a reproductive right undermines the widespread protection of  
276 abortion under the rights to life, as well as global recognition of access to safe, legal abortion as a  
277 fundamental right of women (31,32). This warrants a need for further education on the sexual and  
278 reproductive health rights of girls and women in Namibia.

279 Most participants showed strong support for abortion to be permitted in cases of rape and in conditions  
280 where the pregnancy poses a health risk to the woman. Similarly, studies in Nigeria found that participants  
281 were in support of legalizing abortion on medical grounds and in cases of rape or incest (21,33). These  
282 perceptions were in line with the current abortion laws in Namibia that stipulate that abortion may be  
283 permissible when the continuation of the pregnancy endangers the mother's life, when the child is at risk  
284 of severe physical and mental defect, and when the pregnancy results from rape or incest (34). Participants'  
285 beliefs, however, appeared to be divided on whether abortion should be permissible if the pregnant woman  
286 is mentally incapacitated or if the fetus has congenital anomalies. According to a report by the Guttmacher  
287 Institute, abortion is not permissible under any circumstances, in 14 African countries and is generally  
288 permitted only to save the life of the woman (35,36). While we did not conduct an analysis of the differences  
289 between these viewpoints, the perceptions of the participants regarding the circumstances for permissible  
290 abortion may be reflective of participants' openness to conditional, scenario-based abortions.

291 We also observed divided opinions among the participants regarding the intersections between abortion and  
292 contraceptive use. The stance of the participants on whether legalizing abortion would lead to women using  
293 abortion as a substitute for contraceptives or would undermine pregnancy prevention methods was  
294 inconclusive. There is currently a dearth of research on trends in contraceptive use following abortion  
295 legalization in Africa and other countries. In a review of abortion and contraceptive use in Sub-Saharan  
296 Africa, Don Laura posits, based on the available evidence, that the contemporary use of abortion in Sub-  
297 Saharan Africa often substitutes for and sometimes surpasses modern contraceptive practices (36). The  
298 review further concluded that abortion has been and will likely continue to be used as a means of family

299 planning within much of sub-Saharan Africa (36). It is, however, plausible that the increased use of abortion  
300 may be reflective of the unmet need for contraceptives, especially among adolescents. While Namibia has  
301 made significant strides in increasing the contraceptive prevalence rate (CPR) from 23% in 1992 to 61% in  
302 2020 (37) teenage pregnancy rate remains a serious concern, with one in every five (19%) girls between  
303 the ages of 15 to 19 years becoming pregnant (37). Unintended pregnancies push adolescents to resort to  
304 clandestine, unsafe abortions, which increases the risk of health complications such as sepsis, severe  
305 anemia, disabilities, infertility and death (29,30).

306 Participants also had divided opinions on whether legalizing abortion would reduce the social stigma  
307 surrounding illegal abortion. Abortion stigma is a widely recognized contributor to secret unsafe abortions,  
308 often due to the strong social construction of the immorality of abortion (22,30). A systematic review by  
309 Munakampe et al (2018) found that the fear of shame following an abortion was far much higher than the  
310 stigma due to pregnancy, which could potentially explain why adolescents would not opt for safe abortions  
311 even in places where abortion is legal (30). These results could be suggestive that legalizing abortion and  
312 increasing access to safe abortion might not necessarily reduce unsafe abortion practices. Further research  
313 is needed to investigate the relationship between legalizing safe abortions and incidences of illegal, unsafe  
314 abortions.

### 315 **Strengths and limitations**

316 Our findings should be considered in the context of the strengths and limitations of our study population  
317 and design. First, the study only captured the perceptions of women residing in //Gereres, Keetmanshoop,  
318 and therefore cannot be generalized for the entire Namibia. Second, the study only included women.  
319 Capturing the perspectives of men could be insightful in comparing the gender differences in perceptions  
320 regarding the legalization of abortion in Namibia. Third, we did not conduct statistical analysis to determine  
321 the correlation strength of the factors influencing the participants' perceptions. In terms of strengths, our  
322 study is among the few studies conducted in Namibia to assess the perceptions on the acceptability of



323 legalizing abortion. The study expands our understanding of the important factors to be considered in the  
324 legalization of abortion in Namibia.

### 325 **Conclusion**

326 Our findings demonstrate that women were mostly not in support of legalizing abortion in Namibia.  
327 Religious and cultural beliefs appeared to be highly influential in the participant's perceptions regarding  
328 abortion legalization. Participants' concerns that abortion legalization would lead to promiscuity and its  
329 potential implication in increasing sexually transmitted diseases were found to be important factors. The  
330 study also highlighted that participants had varied opinions about the circumstances under which abortion  
331 should be permissible but demonstrated openness for inclusivity regarding conditions for permissible  
332 abortion. Moreover, the study shed light on fears and concerns about abortion being used as a substitute  
333 rather than complementing contraceptive use and other family planning methods. Further research is needed  
334 to explore the health policy implementation strategies that can prevent unintended pregnancies, avert the  
335 negative consequences of illegal, unsafe abortions, and achieve the Sustainable Development Goals for  
336 improved maternal and adolescent health.

### 337 **Acknowledgements**

338 We wish to thank all the authorities that granted us the permission to conduct this study and the Bachelor  
339 of Nursing students at the University of Namibia, Southern Campus and Main Campus who gave up their  
340 time to be involved in this study. Thank you.

341

342

343

344

345

346

347 **References**

- 348 1. Mprah W, Duorinaah J, Opuku M, Nketsia W, Amponteng M. Knowledge and Abortion,  
349 attitudes of deaf persons towards safe services in Ghana. PLoS One.  
350 2023;18(4):E0281995.
- 351 2. Fathalla M. Safe abortion: The public health rationale. Best Pr Res Clin Obs Gynaecol.  
352 2020;63:2–12.
- 353 3. Puri M, Raifman S, Daniel S, Karki S, Maharjan D, Ahlbach C, et al. Denial of legal  
354 abortion in Nepal. PLoS One. 2023;18(3):e0282886.
- 355 4. Husselmann C. Abortion law in Namibia and South Africa [Internet]. (Doctoral  
356 dissertation) University of Pretoria. 2019. Available from:  
357 <http://hdl.handle.net/2263/73355>
- 358 5. Salaudeen A, Adebayo B. Abortion is legal in Namibia, but only if a woman is in danger  
359 or has been sexually abused. Activists are demanding reform. CNN [Internet]. 2020 Nov  
360 27; Available from: [https://www.cnn.com/2020/11/26/africa/namibia-abortion-reform-](https://www.cnn.com/2020/11/26/africa/namibia-abortion-reform-intl/index.html)  
361 [intl/index.html](https://www.cnn.com/2020/11/26/africa/namibia-abortion-reform-intl/index.html)
- 362 6. Moyo S V. Safe guarding the sexual reproductive rights of young women [Internet].  
363 Section 27 Abortion in East and Southern Africa. 2020. Available from: [https://abortion-](https://abortion-esa.section27.org.za/namibia/)  
364 [esa.section27.org.za/namibia/](https://abortion-esa.section27.org.za/namibia/)

- 365 7. Ikela S. Abortion debate heats up... church, parliament enter fray. New Era [Internet].  
366 2020 Jun 26; Available from: [neweralive.na/posts/abortion-debate-heats-up-church-](https://neweralive.na/posts/abortion-debate-heats-up-church-parliament-enter-fray)  
367 [parliament-enter-fray](https://neweralive.na/posts/abortion-debate-heats-up-church-parliament-enter-fray)
- 368 8. HEARD. Unsafe abortion in Namibia: country factsheet [Internet]. Durban: Health  
369 Economics and HIV/AIDS Research Division/ University of KwaZulu-Natal. 2016.  
370 Available from: [https://www.heard.org.za/wp-content/uploads/2016/06/namibia-country-](https://www.heard.org.za/wp-content/uploads/2016/06/namibia-country-factsheet-abortion-2016.pdf)  
371 [factsheet-abortion-2016.pdf](https://www.heard.org.za/wp-content/uploads/2016/06/namibia-country-factsheet-abortion-2016.pdf)
- 372 9. Ndeyanale E. Traditional leaders oppose abortion law reform. The Namibian [Internet].  
373 2022 Jan 24; Available from: [https://www.namibian.com.na/6217314/archive-](https://www.namibian.com.na/6217314/archive-read/Traditional-leaders-oppose-abortion-law-reform)  
374 [read/Traditional-leaders-oppose-abortion-law-reform](https://www.namibian.com.na/6217314/archive-read/Traditional-leaders-oppose-abortion-law-reform)
- 375 10. Ngatjiheue C, Forbes A. Activists turn parliament into abortion battlefield. The Namibian  
376 [Internet]. 2021; Available from: [https://www.namibian.com.na/6214518/archive-](https://www.namibian.com.na/6214518/archive-read/Activists-turn-parliament-into-abortion-battlefield)  
377 [read/Activists-turn-parliament-into-abortion-battlefield](https://www.namibian.com.na/6214518/archive-read/Activists-turn-parliament-into-abortion-battlefield)
- 378 11. Intelligence Consultancy Namibia. Legalising- Abortion. [Internet]. 2017. Available from:  
379 <https://intelliconn.wordpress.com/2017/03/29/legalising-abortion/>
- 380 12. Mwatilifange S. A comparative study of men and women's attitudes towards the  
381 legalization of availability of abortion on demand: The case of Youth Canters in Katutura,  
382 Windhoek. Dr Diss Univ Namibia [Internet]. 2017; Available from:  
383 [https://repository.unam.edu.na/bitstream/handle/11070/2260/mwatilifange2017.pdf?seque](https://repository.unam.edu.na/bitstream/handle/11070/2260/mwatilifange2017.pdf?sequence=1&isAllowed=y)  
384 [nce=1&isAllowed=y](https://repository.unam.edu.na/bitstream/handle/11070/2260/mwatilifange2017.pdf?sequence=1&isAllowed=y)
- 385 13. Smith S. Abortion: Every woman's right. [Internet]. 2013. Available from:

- 386 <https://socialistworker.org/2013/11/01/abortion-every-womans-right>
- 387 14. Witbooi R. Legalise Women’s Reproductive Rights. New Era [Internet]. 2016 May 13;  
388 Available from: <https://www.namibian.com.na/150702/archive-read/Legalise-Women’s->  
389 Reproductive-Rights
- 390 15. Nthengwe N. Abortion on Demand in Namibia. The Namibian Newspaper [Internet]. 2022  
391 Apr 23; Available from: <https://www.namibian.com.na/6219872/archive-read/Abortion->  
392 on-Demand-in-Namibia
- 393 16. Legal Assistance Centre. Abortion facts. Windhoek: Legal Assistance Centre.; 2020.
- 394 17. Tjihenuna T. Unsafe abortion reaches 7000 marks. The Namibian. 2017;1.
- 395 18. Namibia Statistics Agency. Namibia Statistics Agency – The official website of the  
396 Namibia Statistics Agency [Internet]. 2011 [cited 2023 Jun 7]. Available from:  
397 <https://nsa.nsa.org.na/>
- 398 19. U.S Department of Health and Human Services. The Belmont Report Office of the  
399 Secretary Ethical Principle and Guidelines for the Protection of Human Subjects of  
400 Research The National Commission for the Protection of Human Subjects of Biomedical  
401 and Behavioral Research [Internet]. 1979. Available from:  
402 <https://www.hhs.gov/ohrp/regulations-and-policy/belmont-report/read-the-belmont->  
403 report/index.html
- 404 20. Håkansson M, Super S, Oguttu M, Makenzius M. Social judgments on abortion and  
405 contraceptive use: A mixed methods study among secondary school teachers and student

- 406 peer-counsellors in western Kenya. *BMC Public Health*. 2020;20(493):1–13.
- 407 21. Okonofua FE, Hammed A, Nzeribe E, Saidu B, Abass T, Adeboye G, et al. Perceptions of  
408 policymakers in Nigeria toward unsafe abortion and maternal mortality. *Int Fam Plan*  
409 *Perspect*. 2009;35(4):194–202.
- 410 22. Astbury-Ward E, Parry O, Carnwell R. Stigma, abortion, and disclosure--findings from a  
411 qualitative study. *J Sex Med*. 2012;9(12):3137-3147.
- 412 23. Dozier JL, Hennink M, Mosley E, Narasimhan S, Pringle J, Clarke L, et al. Abortion  
413 attitudes, religious and moral beliefs, and pastoral care among Protestant religious leaders  
414 in Georgia. *PLoS One*. 2020;15(7):e0235971.
- 415 24. Bisong PB, Ogar JN, Asira AE. The abortion debate: a contribution from Ibuanyidanda  
416 perspective. *Online J Heal Ethics*. 2016;12(2).
- 417 25. Addo BD. Perceptions of senior high school girls in the new Juaben Municipality on  
418 Legalization of abortion in Ghana. Dr Diss Univ Cape Coast [Internet]. 2012; Available  
419 from: <https://ir.ucc.edu.gh/xmlui/handle/123456789/2663>
- 420 26. Jonathan K, Stratmann T. The Effect of Abortion Legalization on Sexual Behavior:  
421 Evidence from Sexually Transmitted Diseases. *J Legal Stud* [Internet]. 2003;32(2):407–  
422 33. Available from: <https://www.jstor.org/stable/10.1086/377049>,
- 423 27. UNAIDS. Country Factsheets: HIV and AIDS Estimates [Internet]. 2021 [cited 2023 Jun  
424 6]. Available from: <https://www.unaids.org/en/regionscountries/countries/namibia>
- 425 28. Djomand G, Schlefer M, Gutreuter S, Tobias S, Patel R, Deluca N, et al. Prevalence and

- 426 Correlates of Genital Infections among Newly Diagnosed Human Immunodeficiency  
427 Virus-Infected Adults Entering Human Immunodeficiency Virus Care in Windhoek,  
428 Namibia. *Sex Transm Dis.* 2016;43(11):698–705.
- 429 29. Atuhaire S. Abortion among adolescents in Africa: A review of practices, consequences,  
430 and control strategies. *Int J Health Plann Manage.* 2019;34:e1378–86.
- 431 30. Munakampe MN, Zulu JM, Michelo C. Contraception and abortion knowledge, attitudes  
432 and practices among adolescents from low and middle-income countries: A systematic  
433 review. *BMC Health Serv Res.* 2018;18(909):1–13.
- 434 31. Allotey P, Ravindran TKS, Sathivelu V. Trends in Abortion Policies in Low- And Middle-  
435 Income Countries. *Annu Rev Public Health.* 2021;42:505–18.
- 436 32. Grimes DA, Benson J, Singh S, Romero M, Ganatra B, Okonofua FE, et al. Sexual and  
437 reproductive health 4 - Unsafe abortion: the preventable pandemic. *Lancet.*  
438 2006;368(9550):1908–19.
- 439 33. Ubajaka CF, Adogu POU, Ilika C, Ilika AL. Perception of Abortion and Abortion Laws  
440 by Lawyers in Anambra State Nigeria. *Int J Clin Med.* 2014;5(12):695–703.
- 441 34. Republic of Namibia Annotated Statutes. Abortion and Sterilization Act 2 of 1975. RSA  
442 GG 4608 1975.
- 443 35. Guttmacher Institute. Facts on Abortion and Unintended Pregnancy in Africa. 2009;
- 444 36. Lauro D. Abortion and contraceptive use in sub-Saharan Africa: how women plan their  
445 families. *Afr J Reprod Health.* 2011;15(1):13–23.

446 37. UNFPA. Investment Cases Towards Ending Unmet Need for Family Planning and  
447 Gender-Based Violence Namibia synthesis report [Internet]. 2021. Available from:  
448 [https://esaro.unfpa.org/sites/default/files/pub-pdf/namibia\\_synthesis\\_report.pdf](https://esaro.unfpa.org/sites/default/files/pub-pdf/namibia_synthesis_report.pdf)

449

450

451
